# Supplementary material for: Transcriptome Analysis and Emerging Driver Identification of CD8+ T Cells in Patients with Vitiligo
Source: Hindawi journal article supplement (doi:10.1155/2019/2503924), 2019-11-26
Supplement: f1 [file 2503924.f1.pdf]

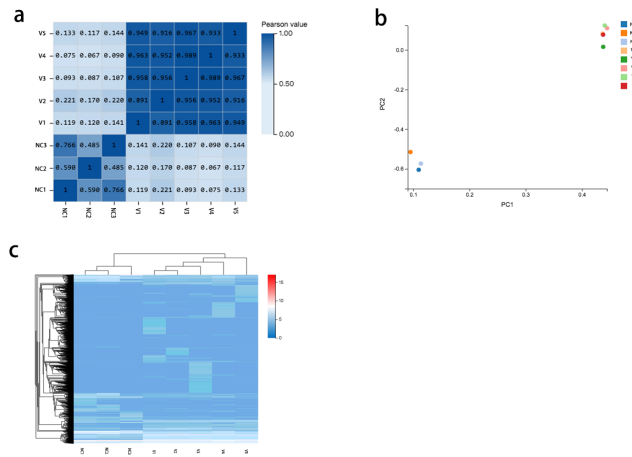

Figure S1: Details of the transcriptome sequencing of CD8<sup>+</sup> T cells from the vitiligo lesional skin and normal controls. a-b. Correlation heatmap and principal components for CD8<sup>+</sup> T cells between vitiligo lesional skin and normal controls. c. Clustering heatmap of DEGs in CD8<sup>+</sup> T cells between vitiligo lesional skin and normal controls. The X-axis represents the sample. The Y-axis represents the DEGs. \*V=Vitiligo, NC=Normal controls.

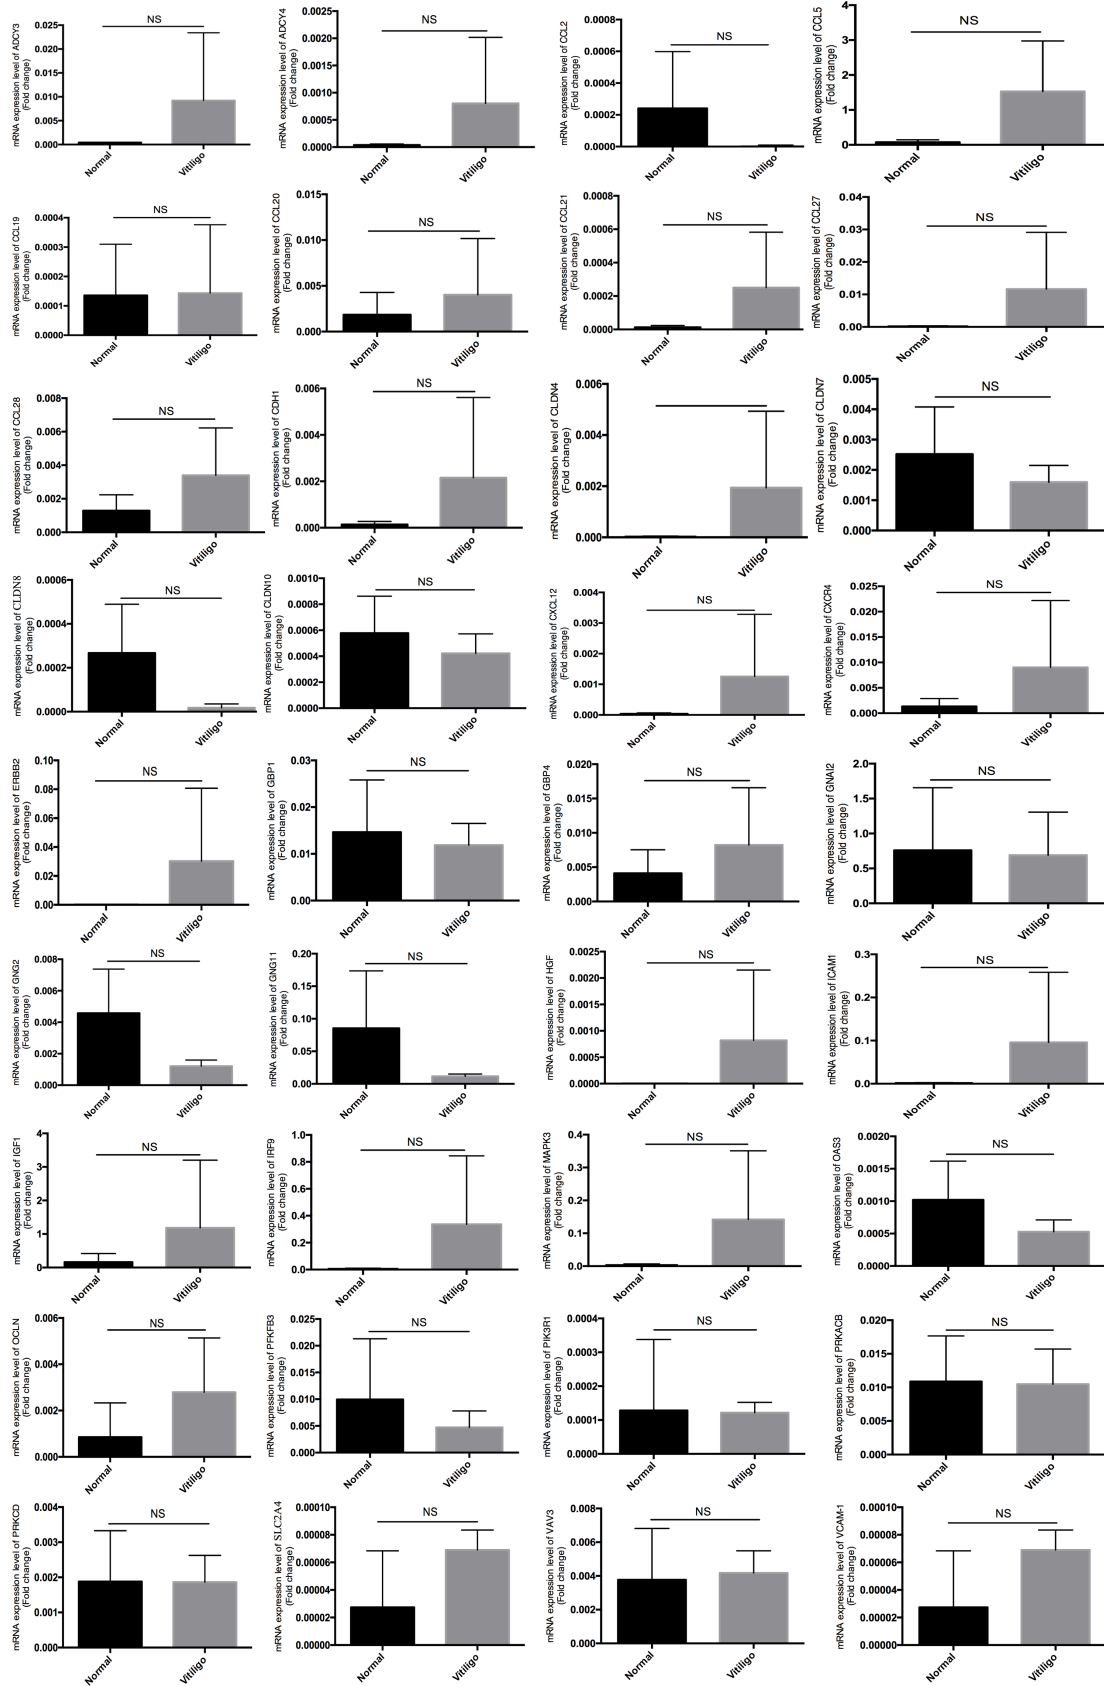

Figure S2: Validation of 36 DEGs by RT-qPCR. NS=non-significance.

Table S1. The list of primers and reference sequences in RT-qPCR

| Primer name | Primer sequence (5' to 3') |
|-------------|----------------------------|
| ADCY3-F     | GGACCAGCAGCAGTTCAA         |
| ADCY3-R     | AAGCCGCAGATGCAGTAG         |
| CCL2-F      | TAGCAGCCACCTTCATTC         |
| CCL2-R      | CTTCTTTGGGACACTTGC         |
| CCL5-F      | AGCCCTCGCTGTCATCCT         |
| CCL5-R      | GGCAATGTAGGCAAAGCAG        |
| CCL19-F     | TTCTCATCAAGGATGGCT         |
| CCL19-R     | CTCTGGATGATGCGTTCTA        |
| CCL20-F     | ACCGTATTCTTCATCCTAA        |
| CCL20-R     | TTCACCCAAGTCTGTTTT         |
| CCL21-F     | GGAAGATTCCCGCCAAGG         |
| CCL21-R     | AGCTGCTGCACCCAGAGC         |
| CCL27-F     | TCCTGAGCCCAGACCCTA         |
| CCL27-R     | GCAGTTCCACCTGGATGAC        |
| CCL28-F     | GCTCCTGGAAAGAGTGAATATGTG   |
| CCL28-R     | GTATGGTTGTGCGGGCTGAC       |
| CDH1-F      | CTTGGTCTACGCCTGGGACT       |
| CDH1-R      | TTGGGAAATGTGAGCAATTCTG     |
| CLDN4-F     | CCTTCATCGGCAGCAACA         |
| CLDN4-R     | CAGCAGCGAGTCGTACACCTT      |
| CXCL12-F    | AAGGTCGTGGTCGTGCTG         |
| CXCL12-R    | CCACTTTAGCTTCGGGTCA        |
| CXCR4-F     | TGACACTCCCGCCCAATA         |
| CXCR4-R     | CCCTGAGCCCATTCCTC          |
| ADCY4-F     | TGCTAGTGACAAACAGGCC        |
| ADCY4-R     | GGACACATTGGGAGCTTGGA       |
| ERBB2-F     | CAGAGGCTGCGGATTGTG         |
| ERBB2-R     | TG TTCAGCGGGTCTCCAT        |
| F2RL1-F     | GAAACTTAAAATTCAGGAGCAA     |
| F2RL1-R     | GAAAACTCATCCACAGAAAAGA     |

|          |                        |
|----------|------------------------|
| GBP1-F   | TGACATACTCCCTGAAGCTG   |
| GBP1-R   | GGCCGATCAAAGACAAAG     |
| GBP4-F   | TTCTCAGCCCGTGGTGGT     |
| GBP4-R   | TGGAGCCCAGAGGGAAGC     |
| HGF-F    | GCCATGAATTTGACCTCTA    |
| HGF-R    | GCTGACATTTGATGCCACT    |
| HIF1A-F  | TACCATCAGCTATTTGCGTG   |
| HIF1A-R  | GAGAACCATAACAAAACCATCC |
| ICAM1-F  | CTGCTCGGGGCTCTGTTC     |
| ICAM1-R  | AGGAGGTGCTGCATGTCA     |
| IGF1-F   | TGCCTGCTCACCTTCACC     |
| IGF1-R   | CCATACCCTGTGGGCTTGT    |
| IRF9-F   | CAGGCAAGCAGGACTTCC     |
| IRF9-R   | GGCGAGTCTTCCAGACAG     |
| MAPK3-F  | GGAGGTGGAGATGGTGAAGG   |
| MAPK3-R  | GGGCTGATCTTCTTGATGGC   |
| OAS3-F   | GCGGGTGCTGAAAAGTGT     |
| OAS3-R   | GCAGTCGAGGAAGATGACAA   |
| OCLN-F   | CAATGGCAAAGTGAATGAC    |
| OCLN-R   | CAGGCGAAGTTAATGGAA     |
| PFKFB3-F | CTGACTCGCTACCTCAACTGG  |
| PFKFB3-R | CGGACTTTCATGGCTTCCT    |
| PIK3CB-F | ACCCAGGGGAAAAATTAGAC   |
| PIK3CB-R | ACAATCCCACAAGTGACAGG   |
| PIK3R1-F | ACATTGCCCGCCTCTTCTTAT  |
| PIK3R1-R | TGTCGTAATTCTGCCAGGTTGC |
| PRKACB-F | TAGCCAAAGCCAAAGAAGACTT |
| PRKACB-R | TGACTCTTCCAAATGAACCTGT |
| PRKCD-F  | AGAAGAACAATGGCAAGGC    |
| PRKCD-R  | CTCCAGGAAATACTGAACAGAC |
| SLC2A4-F | ACTGGCCATTGTTATCGGCA   |
| SLC2A4-R | GTCAGGCGCTTCAGACTCTT   |
| CLDN8-F  | GTGGATGAATTGCGTGAGGC   |

|          |                         |
|----------|-------------------------|
| CLDN8-R  | TAGGTCCGGAGAAAGAGCCA    |
| CLDN10-F | GGAGGCTCCGATAAAGCCAA    |
| CLDN10-R | GCACAGCCCTGACAGTATGA    |
| CLDN7-F  | TTTCATCGTGGCAGGTCTTG    |
| CLDN7-R  | TGTTGGTAGGGATCAAAGGGT   |
| GNG11-F  | CGAAAATGCCTGCCCTTCAC    |
| GNG11-R  | TAGACACTTGTTGTCTCTGCAAC |
| GNAI2-F  | TCAACGACTCAGCTGCCTAC    |
| GNAI2-R  | CATGCATGCGGTTTCATCTCC   |
| GNG2-F   | GGAGCTAAGATCTGCCAGTGA   |
| GNG2-R   | TCAGGCCCTCTCAAAGACT     |
| VAV3-F   | CACGACTTTCTCGAACACCTAT  |
| VAV3-R   | GGCCTTTGTAGATGTCTTCATC  |
| VCAM-1-F | TCCGTCTCATTGACTTGC      |
| VCAM-1-R | TGACTGTGATCGGCTTCC      |

---

Table S2. The list of primers and reference sequences in MethylTarget

| Primer Name        | Primer Sequence                |
|--------------------|--------------------------------|
| HIF-1 $\alpha$ _6F | GGTTGGGTTTTGATAAGTTATTTGAG     |
| HIF-1 $\alpha$ _6R | ATATCTTCACRACRAACRACCCCCAAACTC |
| HIF-1 $\alpha$ _7F | GGGTTATAGAGTAGGTTGGGTTTT       |
| HIF-1 $\alpha$ _7R | CTCCCCTCCCCTCTCTTC             |
| HIF-1 $\alpha$ _8F | GAGGTGGAGGYGGGTTTTT            |
| HIF-1 $\alpha$ _8R | CACCCCCATCTCCTTTCTCTT          |
| F2RL1_4F           | TTTTTATAGTTAGGAAAGGTAAGGGAGA   |
| F2RL1_4R           | CCCCACCCCCTTCCCTAC             |
| F2RL1_5F           | AAGAAAGGTTTTTAGTAGTTGGAGAGG    |
| F2RL1_5R           | CCTAATCCCCTCCCCCAACT           |

Table S3. Details of CpG regions in HIF-1 $\alpha$  and F2RL1 promoter

| Target  | Position | Chr* | Genome<br>Position | Distance<br>2TSS* | Type |
|---------|----------|------|--------------------|-------------------|------|
| HIF1A_6 | 35       | 14   | 62162334           | 216               | CG   |
| HIF1A_6 | 41       | 14   | 62162340           | 222               | CG   |
| HIF1A_6 | 47       | 14   | 62162346           | 228               | CG   |
| HIF1A_6 | 54       | 14   | 62162353           | 235               | CG   |
| HIF1A_6 | 57       | 14   | 62162356           | 238               | CG   |
| HIF1A_6 | 64       | 14   | 62162363           | 245               | CG   |
| HIF1A_6 | 68       | 14   | 62162367           | 249               | CG   |
| HIF1A_6 | 86       | 14   | 62162385           | 267               | CG   |
| HIF1A_6 | 98       | 14   | 62162397           | 279               | CG   |
| HIF1A_6 | 103      | 14   | 62162402           | 284               | CG   |
| HIF1A_6 | 142      | 14   | 62162441           | 323               | CG   |
| HIF1A_6 | 144      | 14   | 62162443           | 325               | CG   |
| HIF1A_6 | 161      | 14   | 62162460           | 342               | CG   |
| HIF1A_6 | 170      | 14   | 62162469           | 351               | CG   |
| HIF1A_6 | 175      | 14   | 62162474           | 356               | CG   |
| HIF1A_7 | 30       | 14   | 62162855           | 737               | CG   |
| HIF1A_7 | 42       | 14   | 62162843           | 725               | CG   |
| HIF1A_7 | 45       | 14   | 62162840           | 722               | CG   |
| HIF1A_7 | 47       | 14   | 62162838           | 720               | CG   |
| HIF1A_7 | 58       | 14   | 62162827           | 709               | CG   |
| HIF1A_7 | 62       | 14   | 62162823           | 705               | CG   |
| HIF1A_7 | 65       | 14   | 62162820           | 702               | CG   |
| HIF1A_7 | 92       | 14   | 62162793           | 675               | CG   |
| HIF1A_7 | 111      | 14   | 62162774           | 656               | CG   |
| HIF1A_7 | 116      | 14   | 62162769           | 651               | CG   |
| HIF1A_7 | 132      | 14   | 62162753           | 635               | CG   |
| HIF1A_7 | 143      | 14   | 62162742           | 624               | CG   |
| HIF1A_7 | 146      | 14   | 62162739           | 621               | CG   |
| HIF1A_7 | 155      | 14   | 62162730           | 612               | CG   |

|         |     |    |          |      |    |
|---------|-----|----|----------|------|----|
| HIF1A_7 | 165 | 14 | 62162720 | 602  | CG |
| HIF1A_7 | 169 | 14 | 62162716 | 598  | CG |
| HIF1A_7 | 172 | 14 | 62162713 | 595  | CG |
| HIF1A_8 | 20  | 14 | 62162078 | -40  | CG |
| HIF1A_8 | 33  | 14 | 62162065 | -53  | CG |
| HIF1A_8 | 37  | 14 | 62162061 | -57  | CG |
| HIF1A_8 | 40  | 14 | 62162058 | -60  | CG |
| HIF1A_8 | 46  | 14 | 62162052 | -66  | CG |
| HIF1A_8 | 69  | 14 | 62162029 | -89  | CG |
| HIF1A_8 | 72  | 14 | 62162026 | -92  | CG |
| HIF1A_8 | 93  | 14 | 62162005 | -113 | CG |
| HIF1A_8 | 117 | 14 | 62161981 | -137 | CG |
| HIF1A_8 | 124 | 14 | 62161974 | -144 | CG |
| HIF1A_8 | 127 | 14 | 62161971 | -147 | CG |
| HIF1A_8 | 133 | 14 | 62161965 | -153 | CG |
| HIF1A_8 | 139 | 14 | 62161959 | -159 | CG |
| HIF1A_8 | 152 | 14 | 62161946 | -172 | CG |
| HIF1A_8 | 155 | 14 | 62161943 | -175 | CG |
| F2RL1_4 | 30  | 5  | 76114563 | -238 | CG |
| F2RL1_4 | 33  | 5  | 76114566 | -235 | CG |
| F2RL1_4 | 38  | 5  | 76114571 | -230 | CG |
| F2RL1_4 | 74  | 5  | 76114607 | -194 | CG |
| F2RL1_4 | 76  | 5  | 76114609 | -192 | CG |
| F2RL1_4 | 102 | 5  | 76114635 | -166 | CG |
| F2RL1_4 | 113 | 5  | 76114646 | -155 | CG |
| F2RL1_4 | 151 | 5  | 76114684 | -117 | CG |
| F2RL1_4 | 161 | 5  | 76114694 | -107 | CG |
| F2RL1_4 | 165 | 5  | 76114698 | -103 | CG |
| F2RL1_4 | 171 | 5  | 76114704 | -97  | CG |
| F2RL1_4 | 178 | 5  | 76114711 | -90  | CG |
| F2RL1_4 | 197 | 5  | 76114730 | -71  | CG |
| F2RL1_4 | 199 | 5  | 76114732 | -69  | CG |
| F2RL1_4 | 205 | 5  | 76114738 | -63  | CG |



|         |     |   |          |     |    |
|---------|-----|---|----------|-----|----|
| F2RL1_4 | 212 | 5 | 76114745 | -56 | CG |
| F2RL1_4 | 219 | 5 | 76114752 | -49 | CG |
| F2RL1_4 | 227 | 5 | 76114760 | -41 | CG |
| F2RL1_5 | 30  | 5 | 76115626 | 825 | CG |
| F2RL1_5 | 55  | 5 | 76115601 | 800 | CG |
| F2RL1_5 | 60  | 5 | 76115596 | 795 | CG |
| F2RL1_5 | 62  | 5 | 76115594 | 793 | CG |
| F2RL1_5 | 79  | 5 | 76115577 | 776 | CG |
| F2RL1_5 | 91  | 5 | 76115565 | 764 | CG |
| F2RL1_5 | 102 | 5 | 76115554 | 753 | CG |
| F2RL1_5 | 114 | 5 | 76115542 | 741 | CG |
| F2RL1_5 | 120 | 5 | 76115536 | 735 | CG |
| F2RL1_5 | 122 | 5 | 76115534 | 733 | CG |
| F2RL1_5 | 131 | 5 | 76115525 | 724 | CG |
| F2RL1_5 | 144 | 5 | 76115512 | 711 | CG |

---

\*Chr=chromosome, TSS= transcriptional start site
